# Supplementary material for: Diterpenoid Caesalmin C Delays Aβ-Induced Paralysis Symptoms via the DAF-16 Pathway in Caenorhabditis elegans
Source: MDPI journal article supplement (doi:10.3390/ijms23126871), 2022-06-20
Supplement: s1 [file s1]

## Supplementary Figure S1. Analytical Data of caesalmin C

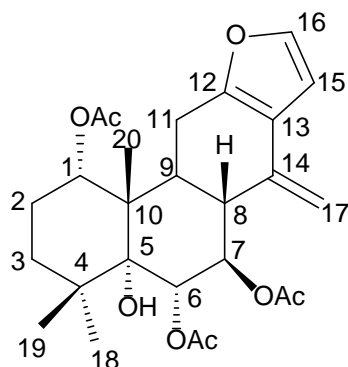

**Caesalmin C** <sup>[1]</sup>: C<sub>26</sub>H<sub>34</sub>O<sub>8</sub>, colorless needles. <sup>1</sup>H-NMR (400 MHz, CDCl<sub>3</sub>,  $\delta$ , ppm, J/Hz): 1.17 (3H, s, H-18), 1.17 (3H, s, H-19), 1.33 (3H, s, H-20), 1.78 (3H, s, 6-OAc), 2.04 (3H, s, 1-OAc), 2.10 (3H, s, 7-OAc), 4.91 (1H, s, H-1), 4.94 (1H, s, H-17a), 5.09 (1H, s, H-17b), 5.60 (2H, s, H-6, 7), 6.41 (1H, s, H-15), 7.23 (1H, s, H-16). <sup>13</sup>C-NMR (100 MHz, CDCl<sub>3</sub>,  $\delta$ , ppm): 14.0 (C-20), 21.1 (1-OAc), 21.2 (6-OAc), 21.5 (7-OAc), 21.9 (C-2), 23.0 (C-11), 24.8 (C-19), 30.5 (C-18), 32.1 (C-3), 37.8 (C-9), 38.3 (C-4), 41.4 (C-8), 44.3 (C-10), 74.8 (C-1), 75.1 (C-6), 75.3 (C-7), 79.0 (C-5), 105.3 (C-17), 106.3 (C-15), 119.5 (C-13), 138.3 (C-14), 141.8 (C-16), 150.3 (C-12), 168.9 (1-OAc), 170.5 (7-OAc), 170.6 (6-OAc).

### Reference

[1] Jiang, R.W., Ma, S.C., But, P.P., Mak, T.C., 2001. New antiviral cassane furanoditerpenes from *Caesalpinia minax*. J. Nat. Prod. 64, 1266–1272.

**Supplementary Figure S2.  $^1\text{H}$  NMR (400 MHz) and  $^{13}\text{C}$  NMR (100 MHz) Spectra of caesalmin C in  $\text{CDCl}_3$**

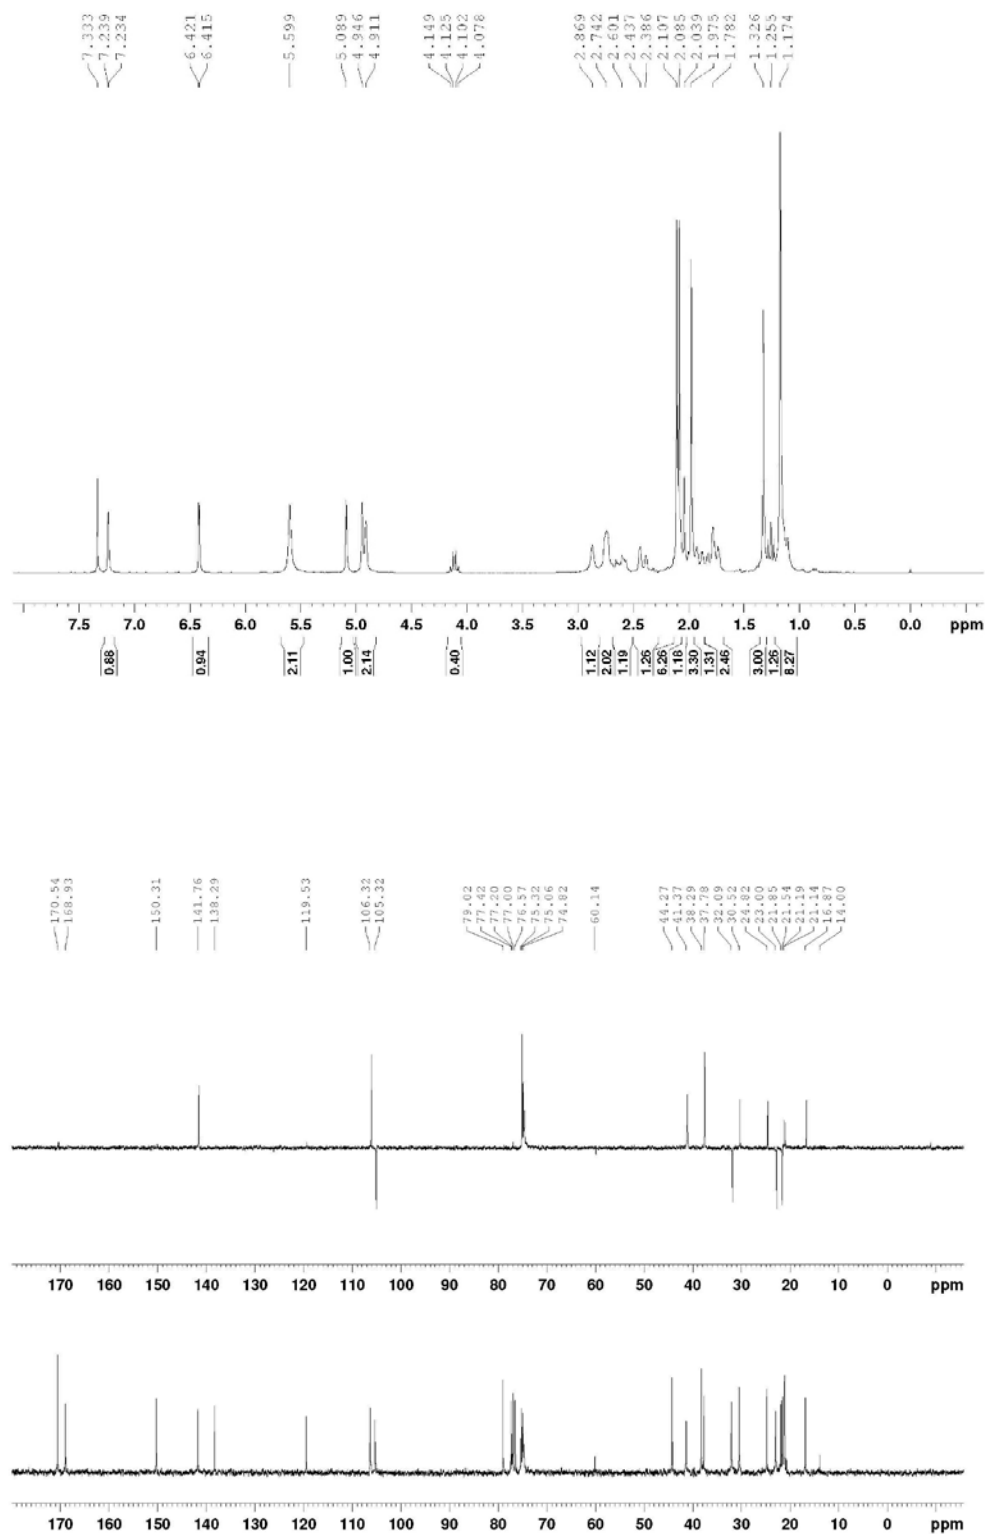

**Supplementary Figure S3. The original WB image corresponding to Fig.2. (A) in the manuscript**

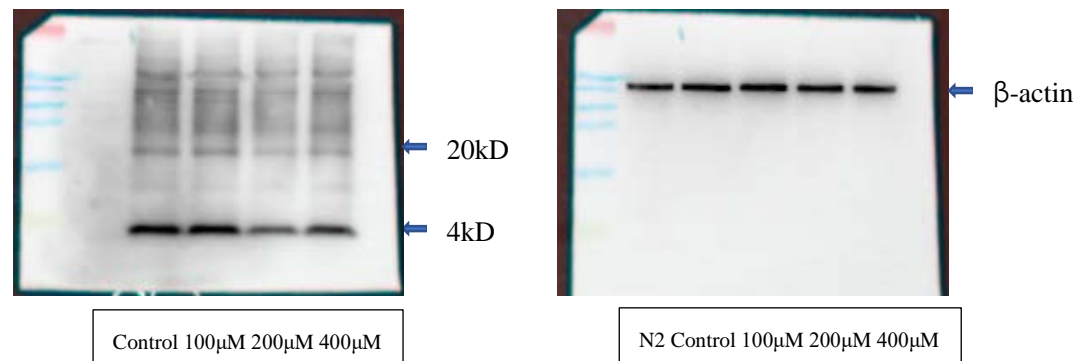

After transferring the protein to the PVDF membrane, the target strip is incubated, exposed, and then closed with membrane regeneration solution before incubating the β-actin strip and exposing it.

**Supplementary Figure S4. The original WB image corresponding to Fig.3. (F) in the manuscript.**

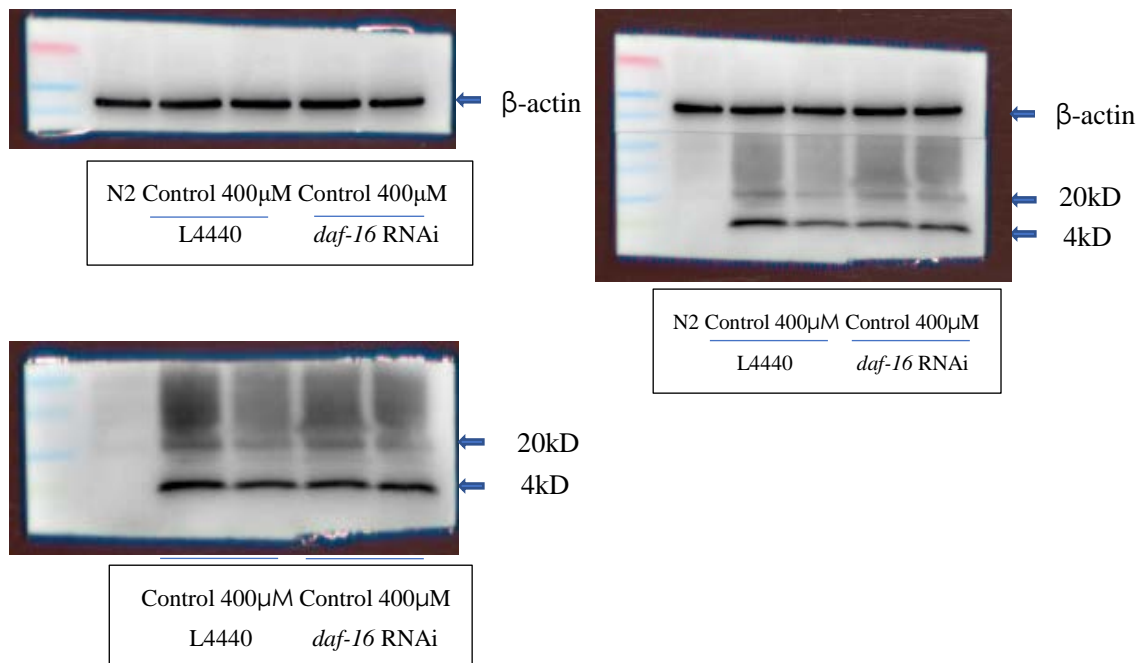

Due to scheduling conflicts in the experiment, after transferring the proteins to the PVDF membrane, they were cut along the location of the β-actin strip and incubated with the corresponding primary antibody for the target strip and the β-actin strip, respectively, and later exposed together. The figure on the right shows the exposure of both strips at the same moment.
